# Supplementary material
Source: publisher figshare collection journal article supplement (https://future-science-group.figshare.com/articles/dataset/_/21673685)
Supplement: Supplementary file 2 [file 1]

## Supplementary Figure 1

```

1  MATDSRTSWLLTVSLLCCLLPQEASAFPAMPLSSLFSNAVLRAQHLHQLAADTYKEFERA Murine GH
   |||:||||:|...:|||| | ||:||||.:|||.||:||||:||||| |||.||| |
1  MATGSRTSLLLAFLGLLCLPWLQEGSAFPTIPLSRDFDNAMLRARHLHQLAFDTYQEFEEA Homo GH

61 YIPEGQRYSI.ONAQAAFCFSETIPAPTGKEEAQORTDMELLRFSLLLIQSWLGPVQFLS Murine GH
   |||.:||:| | ||:|...:||||.|||.||.:|||.||:||||:||||| |||.|||.
61 YIPKEQKYSFLQNPQTSLCFSES IPTPSNRREETQOKSNLELLRISLLLIQSWLEPVQFLR Homo GH

120 RIFTNSLMFGTSDR.VYEKLKDLEEGIQALMQELEDGSPRVGQILKQTYDKFDANMRSDD Murine GH
   .:||.||||:|.|||. ||: ||||| |||.|||. |||||.|||:||||.||||. |||.
121 SVFANSLVYGASDSNVYDLLKDLEEGIQTLMGRLEDGSPRTGQIFKQTYSKFDTNSHNDD Homo GH

179 ALLKNYGLLSCFKKDLHKAETYL RV MKCRRFVESSCAF Murine GH
   ||||| |||:|:|.||:|:|.|||. ||:|:|:|
181 ALLKNYGLLYCFRKDMDKVETFLRI VQCRS.VEGSCGF Homo GH

```
