# Supplementary material
Source: publisher figshare collection journal article supplement (https://future-science-group.figshare.com/articles/dataset/_/21673685)
Supplement: Supplementary file 3 [file 1]

|     |                                                                                     |            |
|-----|-------------------------------------------------------------------------------------|------------|
| 1   | MDLCQVFLTLALAVTSSTFSGSEATPATLGKASPVLQRINPSLGTSSSGKPRFTKCRSPE                        | Murine GHR |
|     | : : :           . . .           :   . : :   .     : :       .   :                   |            |
| 1   | MDLWQLLLTLALAGSSDAFSGSEATAAILSRAFWSLQSVNPGLKTNSSKEPKFTKCRSPE                        | Homo GHR   |
| 61  | LETFSQYWTGEGNDPLKTPGSIQLYYAKRESQRQAARIAHEWTQEWKECPDYVSAGKNSC                        | Murine GHR |
|     | : : : : : . .   .       :   . : :   .                       .                       |            |
| 61  | RETFSCHWTDEVHGHGKNLGPQLFYTRNTQ.....EWTQEWKECPDYVSAGENSC                             | Homo GHR   |
| 121 | YFNSSYTSIWIPYCIKLTNGDLLDQKCFIVDEIVQPDPIGLNWTLLNISLTGIRGDIQ                          | Murine GHR |
|     | :                 .   : :       .               :         :         :               |            |
| 113 | YFNSSFTSIWIPYCIKLTNGGTVDKCFVDEIVQPDPIALNWTLLNVSLTGIHADIQ                            | Homo GHR   |
| 181 | VSWQPPNADVLKGWIIILEYEQYKEVNESKWKVMGPIWLTYPVYSLRMDKEHEVRVRS                          | Murine GHR |
|     | . : :   .     : :       :           .     : :     :   .       : :                   |            |
| 173 | VWWEAPRNADIQKGWVLEYELQYKEVNETKWKMDPILTTSPVPVYSLKVDKEYEVRVRS                         | Homo GHR   |
| 241 | RQRSFEKYSEFSEVLRVIFPQTNILEACEEDIQFPWFLLIIFGIFGVAVMLFVVIFSKQQ                        | Murine GHR |
|     | :     . : . : :               . : .     : :                 .           . :         |            |
| 233 | KQRNSGNYGEFSEVLVYVTLPMQSQFT.CEEDFYFPWLLIIFGIFGLTVMLFVFLFSKQQ                        | Homo GHR   |
| 301 | RIKMLILPPVPVPKIKGIDPDLLEKGLKEEVNTILGIHDNYKPDFYNDDSWVEFIELDID                        | Murine GHR |
|     | :                 .                                                                 |            |
| 292 | RIKMLILPPVPVPKIKGIDPDLLEKGLKEEVNTILAIHDSYKPEFHSDDSWVEFIELDID                        | Homo GHR   |
| 361 | EADVDEKTEGSDTDRLLSNDHEKSAGILGAKDDSGRTSCYDPDILDTDFHTSDMCDGTL                         | Murine GHR |
|     | :         :                   :     .   :           . :       :       . :           |            |
| 352 | EP..DEKTEESDTRLLSSDHEKSHSNLGVKDGDSGRTSCCEPDILETDFNANDIHEGTS                         | Homo GHR   |
| 421 | KFAQSQKLNMEADLLCLDQKNLKNLPY.DASLGS LHPSITQTVEENKPQPLLSSETEATH                       | Murine GHR |
|     | . .     .   :   .                 .         . : . :     :   .           . . : .     |            |
| 410 | EVAQPQRLKGEADLLCLDQKNQNNSPYHDACPATQQPSVIQ.AEKNKPQPLPTEGAESTH                        | Homo GHR   |
| 480 | QLASTPMSNPTSLANIDFYAQVSDITPAGGVVLSPGQKIKAGIAQGNTQREVATPCQENY                        | Murine GHR |
|     | . . :       .                     :                   : .   . : . :   : . .       : |            |
| 469 | QAAHIQLSNPSSLSNIDFYAQVSDITPAGSVVLSPGQKNKAGMSQCMDHPEMVSLCQENF                        | Homo GHR   |
| 540 | SMNSAYFCESDAKKCIAVAPRMEATSCIKPSFNQEDIYITTESLTTTAQMSETADIAPDA                        | Murine GHR |
|     | : .         .         :     : . . .     .   :                   . . . . :   : . : . |            |
| 529 | IMDNAYFCEADAKKCI PVAPHIKVESHIQPSLNQEDIYITTESLTAAGRPGTGEHVPGS                        | Homo GHR   |
| 600 | EMSVPDYTTVHTVQSPRGLILNATALPLPDKNFPSSCGYVSTDQLNKIMQ                                  | Murine GHR |
|     | .         . :   .         .                     .                       .           |            |
| 589 | EMPVPDYTSIHIVQSPQGLILNATALPLPDKE.FLSSCGYVSTDQLNKIMP                                 | Homo GHR   |
