# Supplementary material
Source: publisher figshare collection journal article supplement (https://future-science-group.figshare.com/articles/dataset/_/21673685)

a

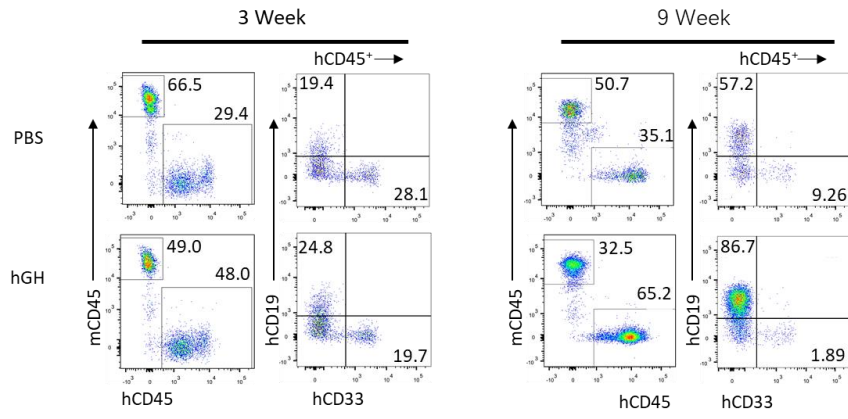

b

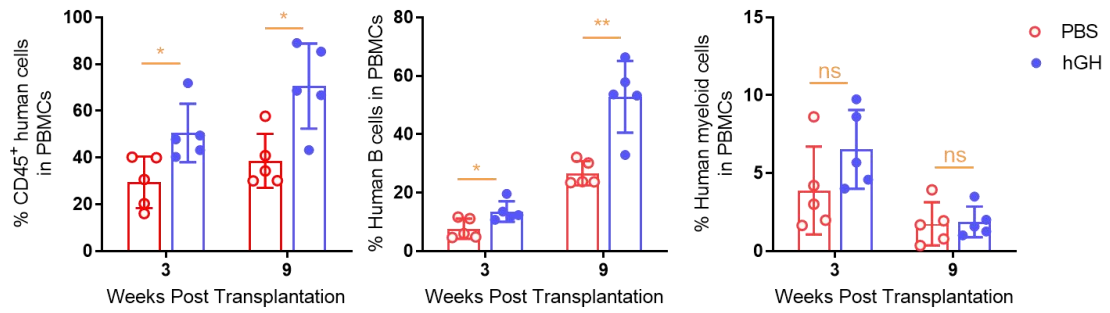

Supplement: Supplementary file 1 [file 1]

PBS

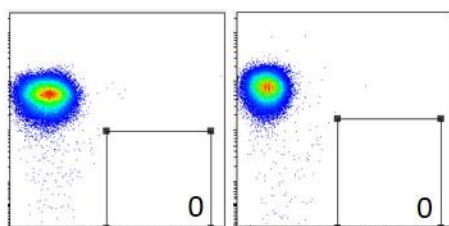

hGH

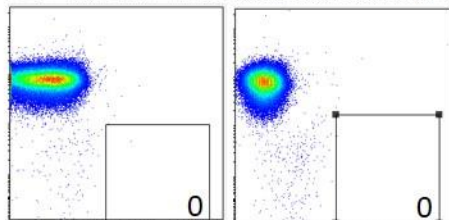

Ter119  
hCD235a

Ter119  
hCD71

Supplement: Supplementary file 4 [file 1]

a

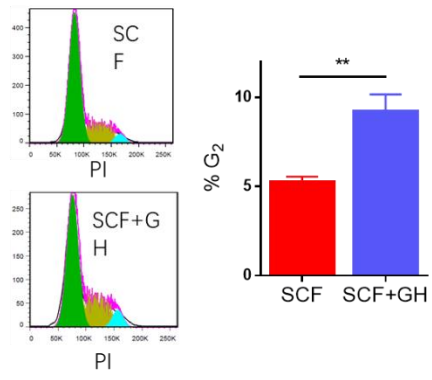

b

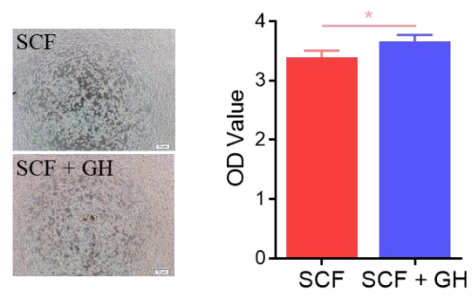

Supplement: Supplementary file 5 [file 1]

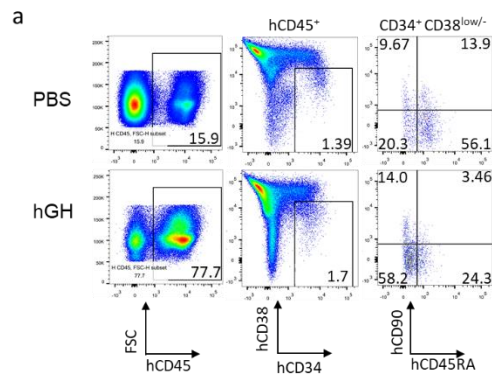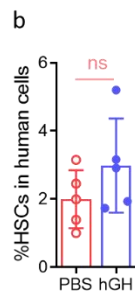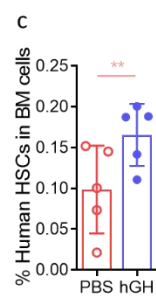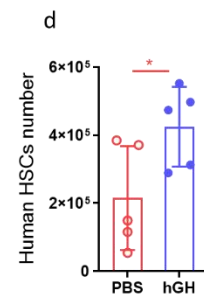

Supplement: Supplementary file 6 [file 1]

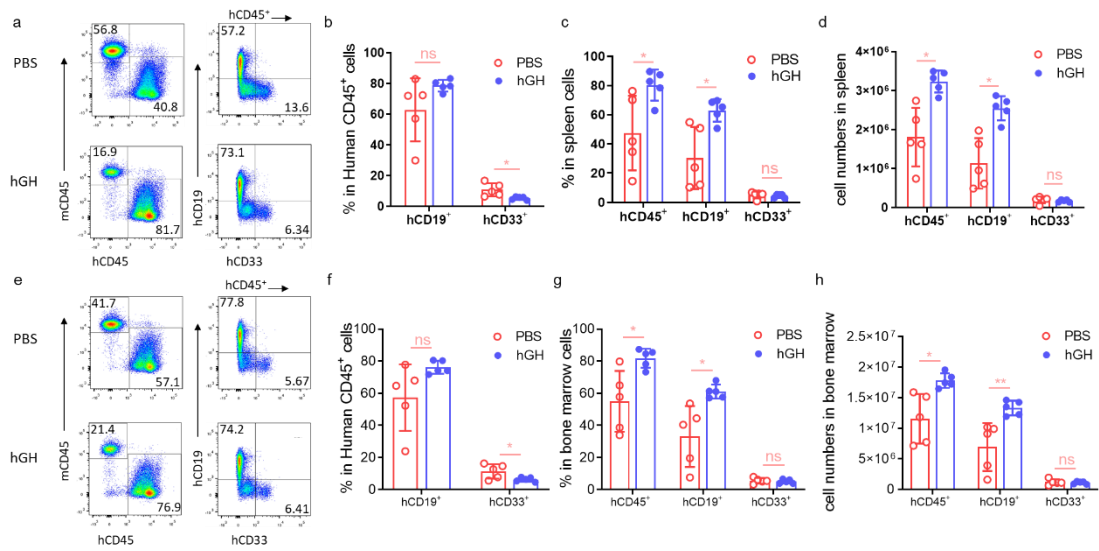

Supplement: Supplementary file 7 [file 1]

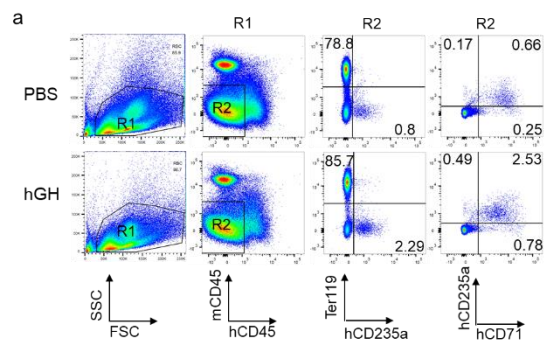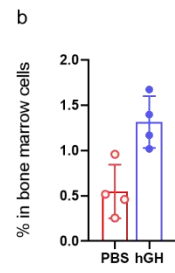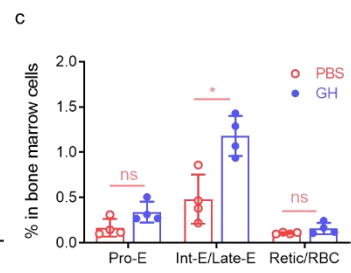

Supplement: Supplementary file 8 [file 1]
